# Supplementary material for: Comparison of Dietary Oils with Different Polyunsaturated Fatty Acid n-3 and n-6 Content in the Rat Model of Cutaneous Wound Healing
Source: PubMed Central journal article supplement (PMC7672592; doi:10.3390/ijms21217911), 2020-10-24
Supplement: ijms-21-07911-s001.pdf [file ijms-21-07911-s001.pdf]

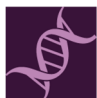

# Comparison of dietary oils with different polyunsaturated fatty acid n-3 and n-6 content in the rat model of cutaneous wound healing

Tomas Komprda<sup>1</sup>, Zbysek Sladek<sup>2</sup>, Zuzana Sevcikova<sup>3</sup>, Veronika Svehlova<sup>1</sup>, Jan Wijacki<sup>2</sup>, Roman Guran<sup>4,5</sup>, Tomas Do<sup>4</sup>, Zuzana Lackova<sup>4,5</sup>, Hana Polanska<sup>6</sup>, Lucie Vrlikova<sup>3</sup>, Vendula Popelkova<sup>1</sup>, Petr Michalek<sup>4,5</sup>, Ondrej Zitka<sup>4,5</sup>, Marcela Buchtova<sup>3\*</sup>

<sup>1</sup> Department of Food Technology, Mendel University in Brno, Zemedelska 1, 613 00 Brno, Czech Republic;

<sup>2</sup> Department of Animal Morphology, Physiology and Genetics, Mendel University in Brno, Zemedelska 1, 613 00 Brno, Czech Republic;

<sup>3</sup> Laboratory of Molecular Morphogenesis, Institute of Animal Physiology and Genetics, v.v.i., Czech Academy of Sciences, Brno, Veвери 97, 602 00 Brno, Czech Republic

<sup>4</sup> Department of Chemistry and Biochemistry, Mendel University in Brno, Zemedelska 1, 613 00 Brno, Czech Republic;

<sup>5</sup> Central European Institute of Technology, Brno University of Technology, Purkynova 123, 612 00 Brno, Czech Republic;

<sup>6</sup> Department of Pathological Physiology, Faculty of Medicine, Masaryk University, Kamenice 5, 625 00 Brno, Czech Republic

<sup>7</sup> Section of Animal Physiology and Immunology, Department of Experimental Biology, Faculty of Science, Masaryk University, Brno 625 00, Czech Republic

\* Correspondence: buchtova@iach.cz

Received: date; Accepted: date; Published: date

## SUPPLEMENTARY FILES

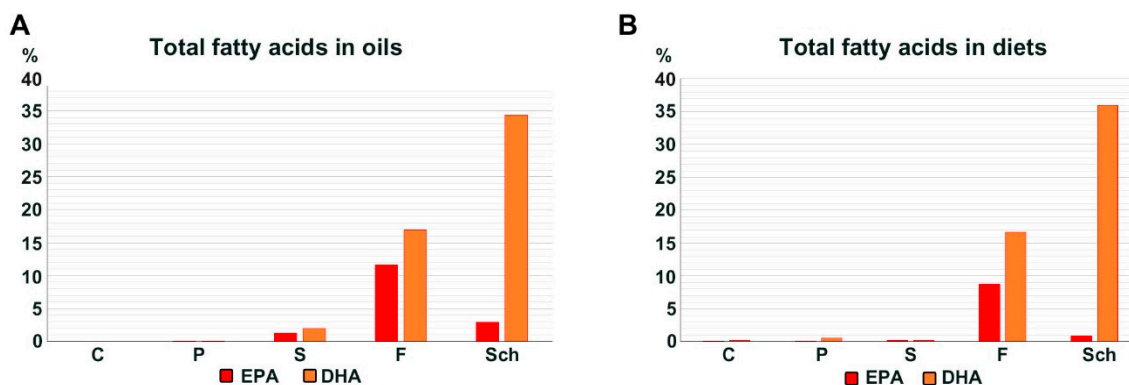

**Figure S1.** Fatty acid content in individual diets

**A, B:** Total fatty acids content (EPA in red, DHA in orange) in used oils and individual diets: a standard diet alone (control, C), or a standard diet enriched with 8% of palm oil (P), safflower oil (S), fish oil (F) and *Schizochytrium* extract (Sch).

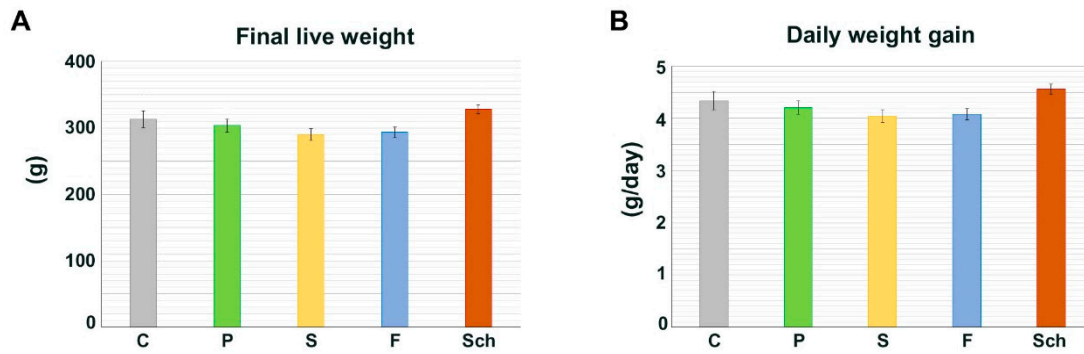

**Figure S2:** Weight characteristics in experimental animals

**A:** Final live weight of experimental animals. **B:** Daily weight gain of rats fed 64 days. SFA – saturated fatty acids, MUFA – monounsaturated fatty acids, PUFA – polyunsaturated fatty acids; stars labeled group of fatty acids differ significantly from the control group (\*  $p < 0.05$ ; \*\*  $p < 0.01$ , \*\*\*  $p < 0.001$ , unpaired t-test;  $n = 10$ ).
